# Supplementary material for: Aptamer-based spectrophotometric detection of kanamycin in milk
Source: Royal Society of Chemistry journal article supplement (doi:10.1039/c3ay41816b), 2013-12-17
Supplement: c3ay41816b.pdf [file c3ay41816b.pdf]

## Electronic Supplementary Information

# Aptamer-based spectrophotometric detection of kanamycin in milk

Nandi Zhou,\* Juan Zhang, Yaping Tian

The Key Laboratory of Industrial Biotechnology, Ministry of Education, School of  
Biotechnology, Jiangnan University, Wuxi 214122, China

\*Corresponding author. Tel: +86-510-85197831; Fax: +86-510-85197831;

E-mail: [zhounandi@jiangnan.edu.cn](mailto:zhounandi@jiangnan.edu.cn)

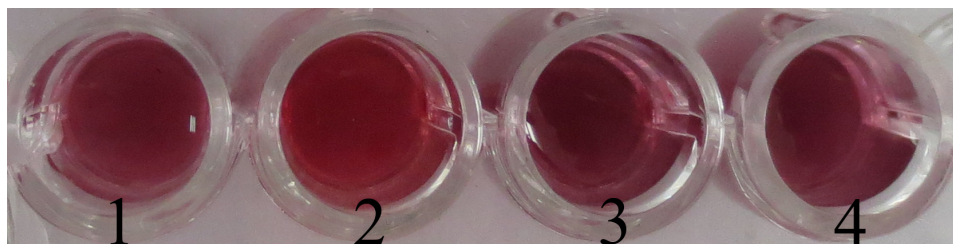

**Fig. S1.** Color change of AuNPs/ssDNA/aptamer solution. Lane 1: without any antibiotics, lane 2: with 500 nM kanamycin, lane 3: with 500 nM streptomycin, lane 4: with 500 nM tetracycline.
